# Supplementary material
Source: PubMed Central journal article supplement (PMC8279589)
Supplement: jci-131-146985-s101.pdf [file jci-131-146985-s101.pdf]

1 **ALKBH1-demethylated DNA N<sup>6</sup>-methyladenine modification triggers vascular**  
2 **calcification via osteogenic reprogramming in chronic kidney disease**

3  
4 **Liu Ouyang,<sup>1,2</sup> Xiaoyan Su,<sup>3</sup> Wenxin Li,<sup>2</sup> Liangqiu Tang,<sup>4</sup> Mengbi Zhang,<sup>3</sup> Yongjun**  
5 **Zhu,<sup>2</sup> Changming Xie,<sup>1,2</sup> Puhua Zhang,<sup>5</sup> Jie Chen,<sup>6</sup> Hui Huang<sup>1,2</sup>**

6  
7 <sup>1</sup>Department of Cardiology, Sun Yat-sen Memorial Hospital, Guangzhou, China

8 <sup>2</sup>Department of Cardiology, the Eighth Affiliated Hospital of Sun Yat-sen University,  
9 Shenzhen, China

10 <sup>3</sup>Department of Nephropathy, Tungwah Hospital of Sun Yat-Sen University, Dongguan,  
11 China

12 <sup>4</sup>Department of Cardiology, Yuebei People's Hospital, Shantou University Medical  
13 College, Shaoguan, China

14 <sup>5</sup>Department of Nephrology, the First Affiliated Hospital of Sun Yat-sen University,  
15 Guangzhou, China

16 <sup>6</sup>Department of Radiation Oncology, Sun Yat-sen Memorial Hospital, Sun Yat-sen  
17 University, Guangzhou, China

18  
19 **Address correspondence to:** Hui Huang, Department of Cardiology, the Eighth  
20 Affiliated Hospital of Sun Yat-sen University, Shennan Middle Rd, Shenzhen, China.

21 Email: huangh8@mail.sysu.edu.cn

22  
23 **Authorship note:** LO, XS, WL, and LT are co–first authors.

24  
25 **Conflicts of interest:** The authors have declared that no conflict of interest exists.

30 **Supplemental Table 1.** Plasma biochemical parameters and bodyweight of adenine-  
 31 diet-induced CKD mice with ALKBH1 deficiency.

| Parameters                 | Control      | CKD          | CKD + sh-Scr | CKD + sh-ALKBH1         |
|----------------------------|--------------|--------------|--------------|-------------------------|
| Body weight (g)            | 28.58±0.9213 | 21.49±1.36*  | 20.63±0.9    | 21.26±2.285             |
| Fast blood glucose (mg/dL) | 134.4±10.65  | 138.3±14     | 131.5±12.3   | 136.7±11.94             |
| Cholesterol (mg/dL)        | 130.69±26.64 | 140.61±23.81 | 135.51±31.91 | 142.09±31.3             |
| Triglyceride (mg/dL)       | 66.56±10.64  | 64.44±10.55  | 69.20±11.53  | 61.63±9.73              |
| Calcium (mmol/L)           | 2.042±0.3229 | 2.002±0.3451 | 1.919±0.34   | 1.943±0.2816            |
| Phosphorus (mmol/L)        | 1.82±0.34    | 3.47±1.31*   | 3.45±1.46    | 3.22±1.79               |
| ALP (IU)                   | 112.5±30.23  | 169.2±19.21* | 178.2±9.814  | 130.5±19.2 <sup>#</sup> |
| suPAR (ng/mL)              | 0.98±0.35    | 11.61±3.06*  | 10.29±3.96   | 8.93±3.44               |
| Creatinine (μmol/L)        | 12.90±2.67   | 41.4±9.25*   | 41.87±8.31   | 42.27±7.36              |
| BUN (mg/dL)                | 10.39±2.55   | 37.25±8.5*   | 35.71±7.26   | 36.63±9.48              |

32 Mice tail veins were inoculated with AAV encoding Scrambled (Scr shRNA) or *Alkbh1* shRNA at  
 33 four weeks after the adenine diet and then fed for four weeks. Statistical significance was  
 34 assessed using one-way ANOVA followed by Dunnett's test. Values are means ± SD (n=11-12  
 35 per group). \*P<0.05 vs. Control. #P<0.05 vs. CKD+sh-Scr.

36 **Supplemental Table 2.** Plasma biochemical parameters and bodyweight of adenine-  
 37 diet-induced CKD mice with ALKBH1 overexpression.

| Parameters                 | Control      | CKD          | CKD + AAV-Vector | CKD + AAV-ALKBH1 |
|----------------------------|--------------|--------------|------------------|------------------|
| Body weight (g)            | 29.64±1.306  | 22.39±1.789* | 22.9±1.194       | 23.37±2.15       |
| Fast blood glucose (mg/dL) | 142.3±12.54  | 138.7±12.94  | 136.6±10.62      | 143.1±12.75      |
| Cholesterol (mg/dL)        | 134.69±37.69 | 143.85±32.81 | 137.90±28.02     | 141.46±36.59     |
| Triglyceride (mg/dL)       | 63.14±13.37  | 61.25±7.07   | 63.38±9.90       | 62.20±11.34      |
| Calcium (mmol/L)           | 2.045±0.4514 | 1.973±0.3258 | 1.895±0.3746     | 1.944±0.3414     |
| Phosphorus (mmol/L)        | 1.97±0.28    | 3.59±1.69*   | 3.73±1.71        | 3.54±1.87        |
| ALP (IU)                   | 100.3±24.62  | 173.7±37.93* | 170.3±34.57      | 208.3±45.2#      |
| suPAR (ng/mL)              | 0.98±0.31    | 10.82±3.53*  | 11.95±3.21       | 12.70±4.26       |
| Creatinine (μmol/L)        | 11.86±3.12   | 42.15±7.59*  | 46.78±7.23       | 44.72±5.42       |
| BUN (mg/dL)                | 10.63±1.94   | 38.29±11.95* | 35.47±11.01      | 35.82±10.32      |

38 Mice tail veins were inoculated with AAV vector or AAV-ALKBH1 at four weeks after the adenine  
 39 diet and then fed for four weeks. Statistical significance was assessed using one-way ANOVA  
 40 followed by Dunnett's test. Values are means ± SD (n=11-12 per group). \*P<0.05 vs. Control.  
 41 #P<0.05 vs. CKD+AAV-Vector.  
 42

43 **Supplemental Table 3.** Plasma biochemical parameters and bodyweight of 5/6-  
 44 nephrectomy-induced CKD mice with ALKBH1 deficiency or overexpression.

| Parameters                 | Sham         | 5/6Nx         | 5/6Nx +<br>sh-Scr | 5/6Nx +<br>sh-ALKBH1 | 5/6Nx +<br>AAV-Vector | 5/6Nx +<br>AAV-ALKBH1 |
|----------------------------|--------------|---------------|-------------------|----------------------|-----------------------|-----------------------|
| Body weight (g)            | 31.32±4.42   | 21.45±1.95*   | 21.41±1.75        | 21.29±1.43           | 22.08±2.33            | 21.71±1.46            |
| Fast blood glucose (mg/dL) | 139.9±12.29  | 135.8±12.29   | 133.4±9.44        | 139.8±7.60           | 132.3±8.88            | 138.4±12.82           |
| Cholesterol (mg/dL)        | 136.86±23.16 | 143.80±31.29  | 141.04±24.08      | 148.12±31.73         | 146.95±23.74          | 144.05±18.19          |
| Triglyceride (mg/dL)       | 68.53±9.39   | 67.90±9.26    | 65.27±8.04        | 65.29±14.32          | 60.70±12.33           | 64.92±6.86            |
| Calcium (mM)               | 1.94±0.21    | 2.06±0.15     | 2.02±0.2          | 1.91±0.23            | 2.14±0.16             | 1.96±0.16             |
| Phosphorus (mM)            | 1.94±0.20    | 3.31±0.63*    | 3.69±0.82         | 3.48±0.74            | 3.65±1.41             | 3.70±1.15             |
| ALP (IU)                   | 92.62±20.97  | 160.79±21.72* | 156.98±20.92      | 111.65±19.35#        | 159.56±23.42          | 203.79±17.09†         |
| suPAR (ng/mL)              | 1.10±0.31    | 12.73±2.62*   | 10.55±3.15        | 8.22±3.60            | 11.02±3.97            | 13.43±3.22            |
| Creatinine (μM)            | 11.84±2.95   | 40.57±10.32*  | 38.95±10.33       | 38.53±6.66           | 43.16±7.59            | 40.07±8.08            |
| BUN (mg/dL)                | 9.75±1.38    | 36.45±7.20*   | 35.96±8.70        | 35.74±6.32           | 36.52±7.97            | 37.31±7.69            |

45 Mice tail veins were inoculated with AAV encoding Scrambled (Scr shRNA) or *Alkbh1* shRNA, or  
 46 AAV-vector or AAV-ALKBH1 at the 4<sup>th</sup> week after the sham or nephrectomy operation, and mice  
 47 were sacrificed at the 8<sup>th</sup> week. Statistical significance was assessed using one-way ANOVA  
 48 followed by Dunnett's test. Values are means ± SD (n=5-8 per group). \*P<0.05 vs. sham. #P<  
 49 0.05 vs. 5/6Nx + sh-Scr. †P<0.05 vs. 5/6Nx + AAV-Vector.

50

51 **Supplemental Table 4.** The primer sequences.

| Species                                    | Gene             | Sequence (forward/reverse)                                                           |
|--------------------------------------------|------------------|--------------------------------------------------------------------------------------|
| <b>qRT-PCR</b>                             |                  |                                                                                      |
| Human                                      | <i>BMP2</i>      | 5' – GGCATCCTCTCCACAAAAGA – 3'<br>5' – ACGTCTGAACAATGGCATGA – 3'                     |
|                                            | <i>ALKBH1</i>    | 5' – AGAAGCGACTAAACGGAGACC – 3'<br>5' – GGGAAAGGTGTGTAATGATCTGC – 3'                 |
|                                            | <i>N6AMT1</i>    | 5' – GCAGGGGAGAACTTCGCTAC – 3'<br>5' – CAGCGCGTTCAAAGCAGAAA – 3'                     |
|                                            | <i>GAPDH</i>     | 5' – GGAGTCAACGGATTTGGT – 3'<br>5' – GTGATGGGATTTCCATTGAT – 3'                       |
|                                            | Mouse            | <i>Bmp2</i>                                                                          |
| <i>N6amt1</i>                              |                  | 5' – AGCCGCATGTACCTTGGA – 3'<br>5' – TACCTCTTCAGGCGGAGTCA – 3'                       |
| <i>Alkbh1</i>                              |                  | 5' – AAGCGAAGACCCCGAAGTTTA – 3'<br>5' – CAGTGGCGACTTGCTCTGA – 3'                     |
| <i>Gapdh</i>                               |                  | 5' – ATTGTCAGCAATGCATCCTG – 3'<br>5' – ATGGACTGTGGTCATGAGCC – 3'                     |
| <b>BMP2 ChIP assay</b>                     |                  |                                                                                      |
| Human                                      | ChIP-1           | 5' – CCGAGTCTTGTCCACACACAA – 3'<br>5' – ATGCATCAGAGGGTACAGACAA – 3'                  |
|                                            | ChIP-2           | 5' – CTAGTCCTTTCTCCAGTGGCTT – 3'<br>5' – TGGAGGGCCAGTGAAGTCAA – 3'                   |
|                                            | ChIP-3           | 5' – CTGGTCTGGCTTTGGTGTCA – 3'<br>5' – CAAGGACTGTGTTTGGCCTG – 3'                     |
| <b>BMP2 promoter luciferase constructs</b> |                  |                                                                                      |
| Human                                      | -3319 bp~ -22 bp | 5' – ACGGTACCCAGTCATCCATGACAGAACCAGG – 3'<br>5' – TGCTCGAGCTTTTAAAGGGGACGCCGCCT – 3' |
|                                            | -2882 bp~ -22 bp | 5' – ACGGTACCGCCACAGGTTTCCATGGAATGAC – 3'<br>5' – TGCTCGAGCTTTTAAAGGGGACGCCGCCT – 3' |
|                                            | -2300 bp~ -22 bp | 5' – ACGGTACCGGCAAACAGACACTCTCCCAAAG – 3'<br>5' – TGCTCGAGCTTTTAAAGGGGACGCCGCCT – 3' |
|                                            | Oct4 Del         | 5' – GATTGTGTGGACAAGACTCGG – 3'<br>5' – TTTCCACTATCTCCTGAGAACTGCC – 3'               |

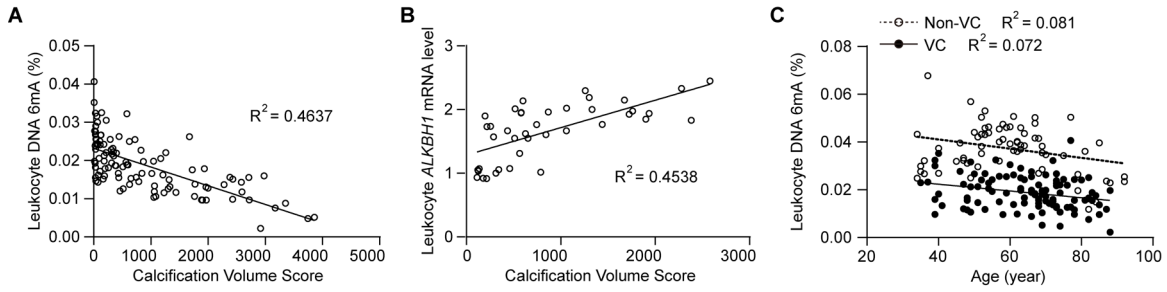

53

54 **Supplemental Figure 1. Correlation between ALKBH1 and vascular calcification during CKD.**

55 **(A)** Scatter dot plot of correlation between leukocyte DNA 6mA level and calcification Volume score

56 from CKD patients with aortic arch calcification (n = 106). **(B)** Scatter dot plot of correlation between

57 leukocyte ALKBH1 mRNA expression level and calcification Volume score from CKD patients with

58 aortic arch calcification (n = 40). **(C)** Reduced DNA 6mA level negatively correlated to age in CKD

59 patients without (Non-VC, n = 67) and with aortic arch calcification (VC, n = 106). Statistical

60 significance was assessed using Pearson's correlation coefficient analysis for correlations.

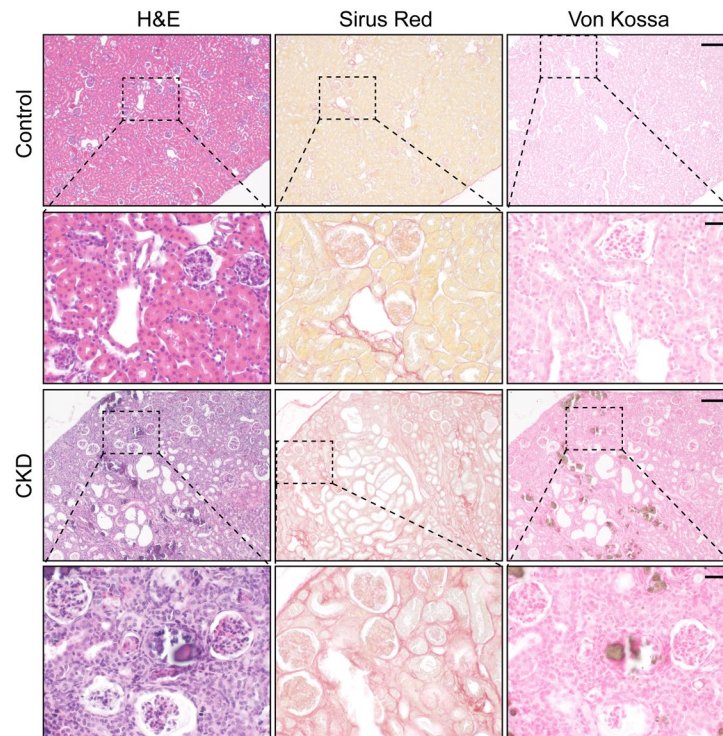

61

62 **Supplemental Figure 2. Histology assessment of the kidney of adenine-diet-induced mice**  
63 **CKD model.** H&E, Masson's trichrome and von Kossa staining of the kidney sections of adenine-  
64 diet-induced mice CKD model. Scale bars: 200  $\mu$ m and 50  $\mu$ m (enlarged).

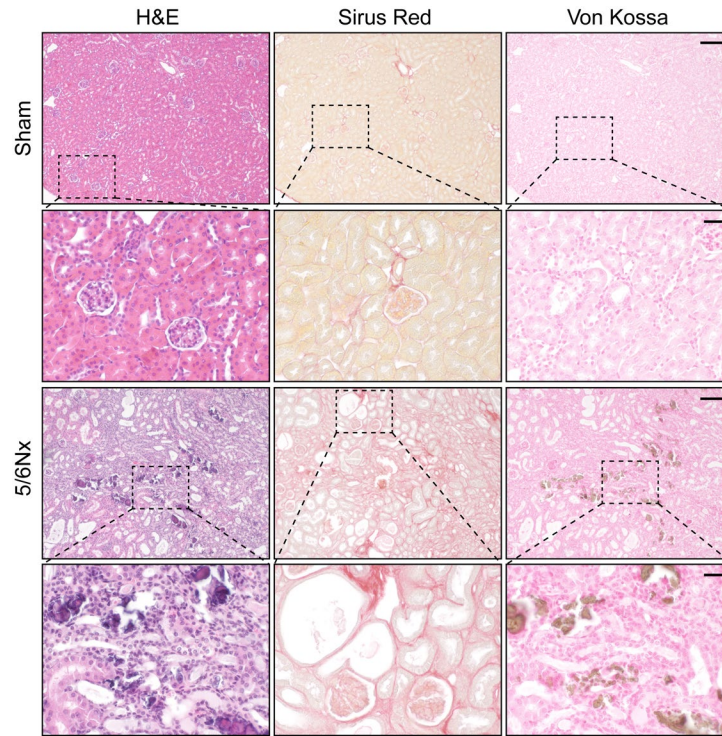

65

66 **Supplemental Figure 3. Histology assessment of the remnant kidney of 5/6-nephrectomy-**  
 67 **induced mice CKD model.** H&E, Masson's trichrome and von Kossa staining of the remnant kidney  
 68 sections of 5/6-nephrectomy-induced mice CKD model. Scale bars: 200  $\mu$ m and 50  $\mu$ m (enlarged).  
 69 5/6Nx, 5/6 nephrectomy.



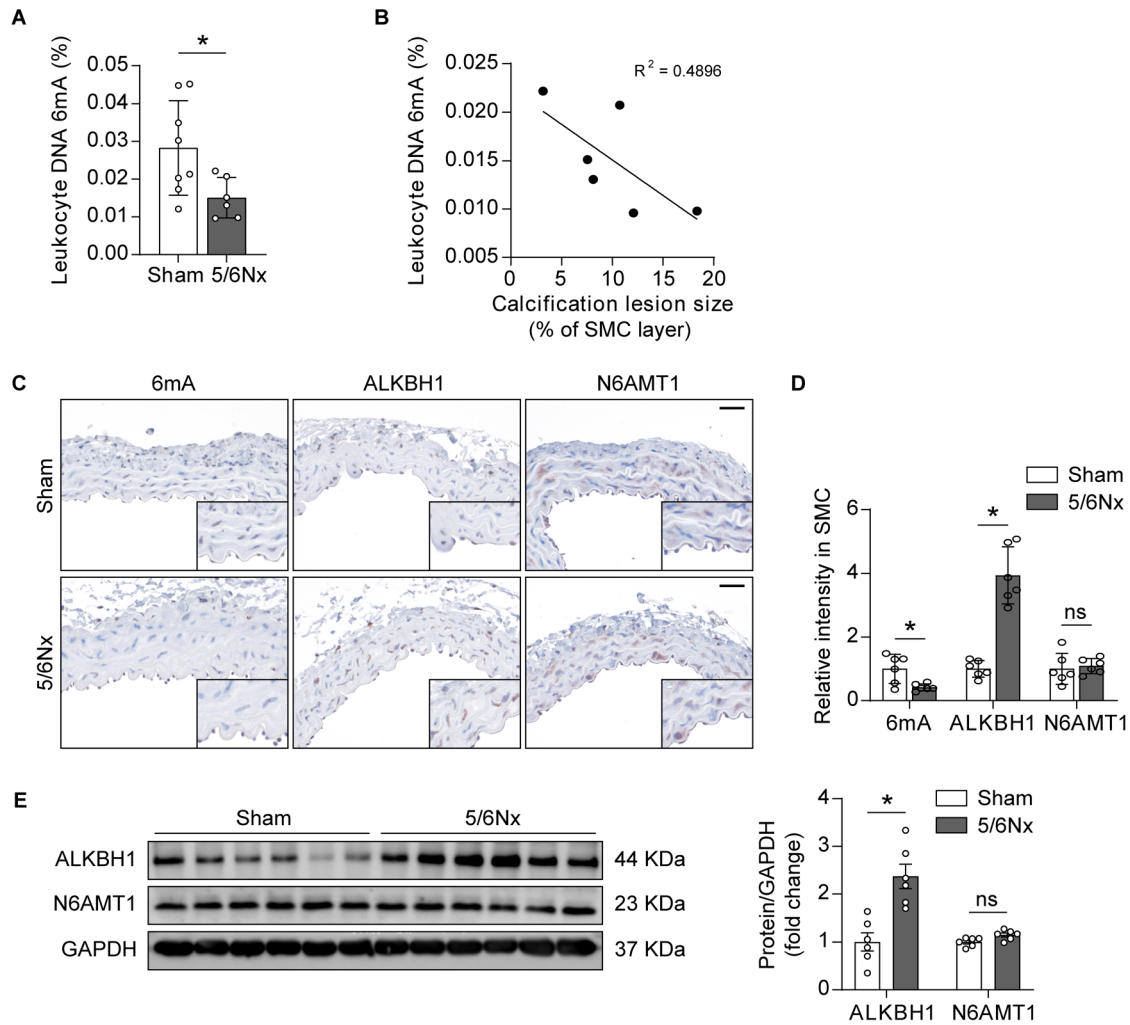

70

71 **Supplemental Figure 4. ALKBH1-demethylated DNA 6mA modification is reduced in CKD**  
 72 **mice induced by 5/6 nephrectomy.** (A) Leukocyte DNA 6mA level in mice challenged with sham  
 73 operation (n = 8) or 5/6 nephrectomy (n = 6). Leukocytes were isolated from peripheral blood. (B)  
 74 Scatter dot plot of correlation between mice leukocyte DNA 6mA level and percentage of calcification  
 75 lesion size in aortic smooth muscle layer from mice with 5/6 nephrectomy (n = 6). (C and D)  
 76 Representative immunohistochemistry pictures (C) and quantification (D) of ALKBH1, N6AMT1, and  
 77 6mA in aortic smooth muscle layer of mice subjected to sham operation or 5/6 nephrectomy (n = 6  
 78 for Sham; n = 6 for 5/6Nx). Scale bars: 50  $\mu$ m. (E) Western blot analysis of ALKBH1 and N6AMT1  
 79 expression in mice aortic arch (n = 6 per group). Statistical significance was assessed using two-  
 80 tailed *t*-tests (A, D and E) and Pearson's correlation coefficient analysis (B). All values are presented  
 81 as means  $\pm$  SD, ns: no significance, \**p* < 0.05.

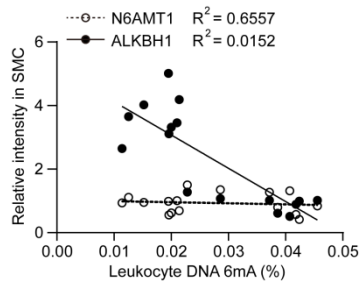

82

83 **Supplemental Figure 5. ALKBH1 expression in the smooth muscle layer is inversely**  
 84 **correlated to reduced leukocyte 6mA level.** Pearson's correlation coefficient analysis for  
 85 leukocyte DNA 6mA level correlated with ALKBH1 and N6AMT1 level assessed by IHC staining in  
 86 the smooth muscle layer of mice aortas, respectively (n = 10-12 per group).

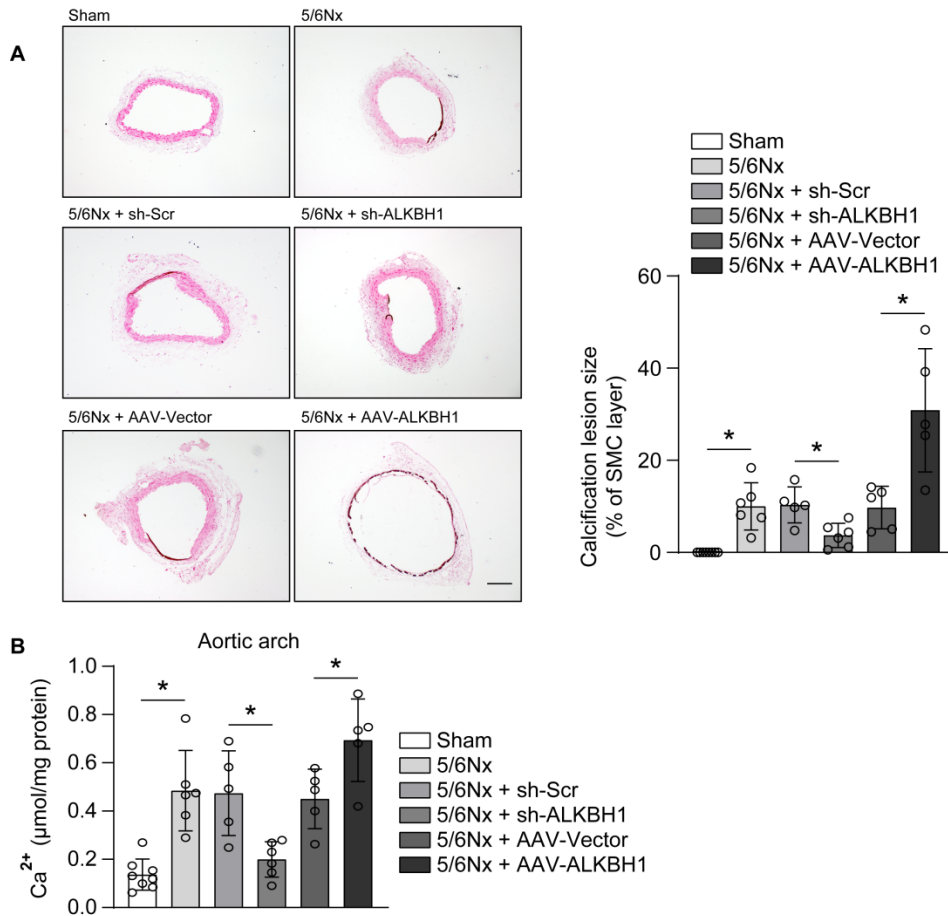

87

88 **Supplemental Figure 6. ALKBH1 is essential for the regulation of CKD-induced vascular**  
 89 **calcification in 5/6-nephrectomy model. (A and B) Von Kossa staining (A) and calcium content**  
 90 **quantification of aortic arch (B) performed in different experimental groups for detecting**  
 91 **mineralization (n = 5-8 per group). Scale bar: 100 μm. Statistical significance was assessed using**  
 92 **one-way ANOVA followed by Dunnett's test. All values are presented as means ± SD, ns: no**  
 93 **significance, \*p < 0.05.**

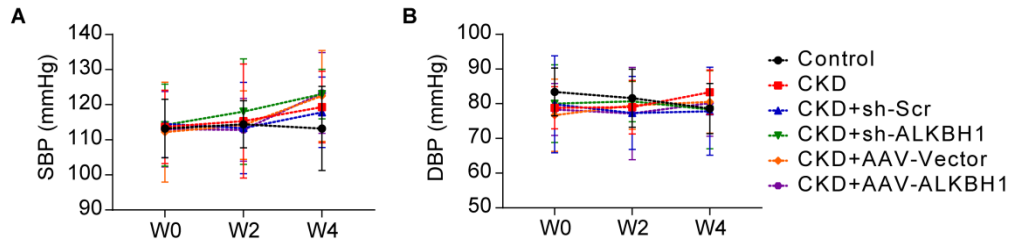

94

95 **Supplemental Figure 7. Blood pressure of CKD mice with ALKBH1 deficiency or**  
 96 **overexpression. (A)** Systolic blood pressure (SBP) in adenine-diet-induced CKD mice before (W0),  
 97 2 (W2) and 4 (W4) weeks after indicated virus injection (n = 5-6 per group). **(B)** Diastolic blood  
 98 pressure (DBP) in adenine-diet-induced CKD mice before (W0), 2 (W2) and 4 (W4) weeks after  
 99 indicated virus injection (n = 5-6 per group). Statistical significance was assessed using one-way  
 100 ANOVA followed by Dunnett's test. All values are presented as means  $\pm$  SD.

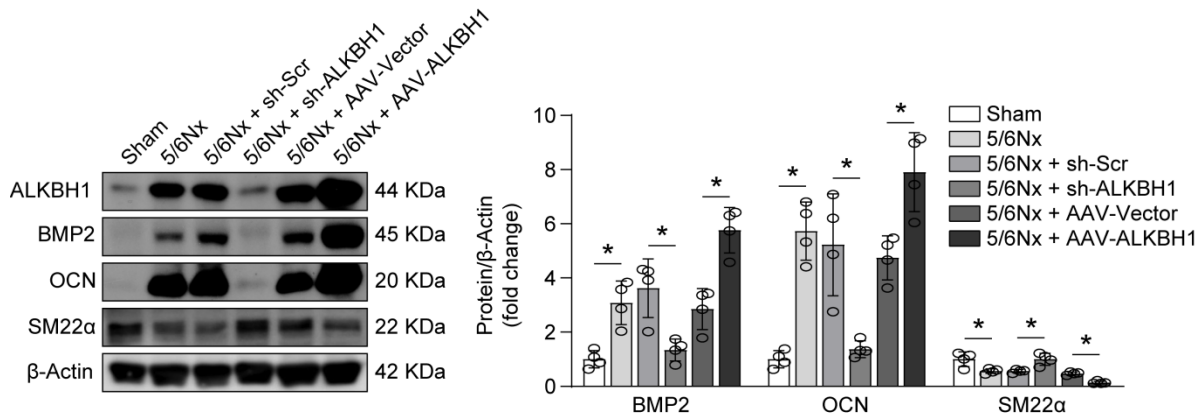

101

102 **Supplemental Figure 8. BMP2 is modulated by ALKBH1 in 5/6-nephrectomy model.** Western  
 103 blot analysis of ALKBH1, BMP2, OCN and SM22α expression in arteries from mice with indicated  
 104 treatments (n = 4 per group). Statistical significance was assessed using one-way ANOVA followed  
 105 by Dunnett's test. All values are presented as means ± SD, ns: no significance, \*p < 0.05.

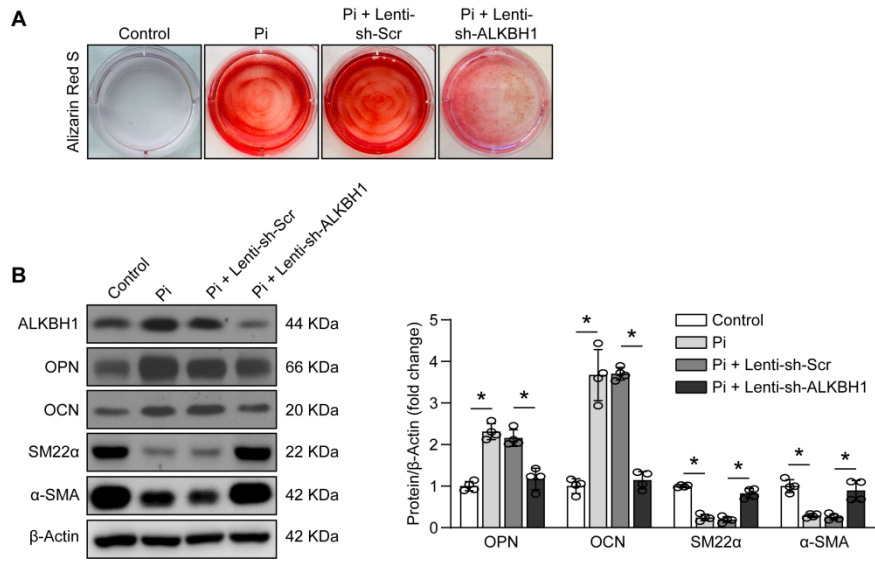

106

107 **Supplemental Figure 9. ALKBH1 deficiency suppresses HASMCs osteogenic reprogramming**  
 108 **and calcification.** (A) Representative photomicrographs of Alizarin red staining in HASMCs pre-  
 109 transfected with scrambled shRNA lentiviruses or *ALKBH1* shRNA lentiviruses and exposed in  
 110 osteogenic medium for another 14 days. (B) Western blot analysis of osteogenic phenotype marker  
 111 (OPN and OCN) and contractile phenotype marker (SM22α and α-SMA) expression in HASMCs with  
 112 ALKBH1 depletion (n = 4 per group). Statistical significance was assessed using one-way ANOVA  
 113 followed by Dunnett's test. All values are presented as means ± SD, \**p* < 0.05.

114

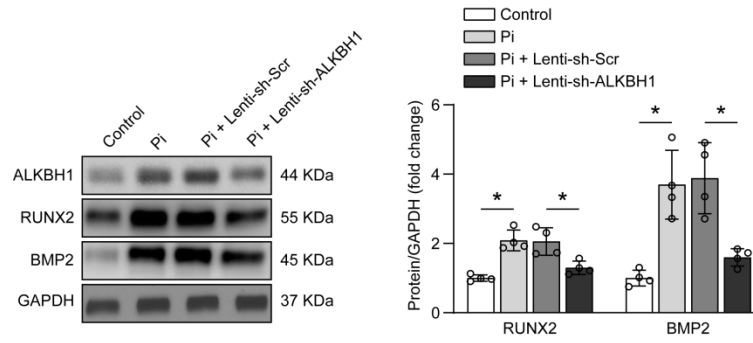

115 **Supplemental Figure 10. BMP2 is downregulated by ALKBH1 depletion in HASMCs.** Western  
116 blot analysis showing the downregulation of BMP2 and RUNX2 in calcified HASMCs pre-transfected  
117 with scrambled shRNA lentiviruses or *ALKBH1* shRNA lentiviruses (n = 4). Statistical significance  
118 was assessed using one-way ANOVA followed by Dunnett's test. All values are presented as means  
119 ± S.D, \* $p < 0.05$ .

120

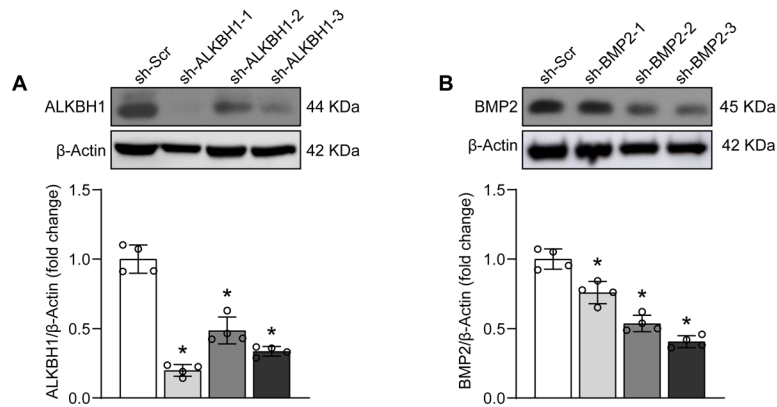

121 **Supplemental Figure 11. The efficiency of ALKBH1 and BMP2 shRNA.** (A) Western blot analysis  
122 showing the efficiency of three different lines of AAV sh-ALKBH1. Mice primary VSMCs were  
123 infected with AAV encoding three different lines of *Alkbh1* shRNA for 48 hours and then cultured in  
124 an osteogenic medium for 14 days (n = 4). (B) Western blot analysis showing the efficiency of three  
125 different lines of AAV sh-BMP2 (n = 4). Statistical significance was assessed using one-way ANOVA  
126 followed by Dunnett's test. All values are presented as means  $\pm$  S.D, \* $p < 0.05$  vs. sh-Scr.
